# Supplementary material
Source: publisher figshare collection journal article supplement (https://acs.figshare.com/ndownloader/files/23184410)
Supplement: Supplementary file 1 [file 23184410]

---

**Supporting information for:**

**Polymer composites entrapped Ce-doped LiYF<sub>4</sub>  
microcrystals for high-sensitivity X-ray scintillation and  
imaging**

*Zhihua Qiu,<sup>†</sup> Shuaihua Wang,<sup>\*</sup> <sup>†</sup> Wenqian Wang,<sup>‡</sup> Shaofan Wu<sup>\*</sup>, <sup>†</sup>*

<sup>†</sup> Key Laboratory of Optoelectronic Materials Chemistry and Physics, Fujian Institute  
of Research on the Structure of Matter, Chinese Academy of Sciences, Fuzhou

350002, People's Republic of China

<sup>‡</sup> University of the Chinese Academy of Sciences, Beijing 100049, People's Republic  
of China

<sup>\*</sup>Corresponding authors:

E-mail: sfwu@fjirsm.ac.cn; shwang@fjirsm.ac.cn

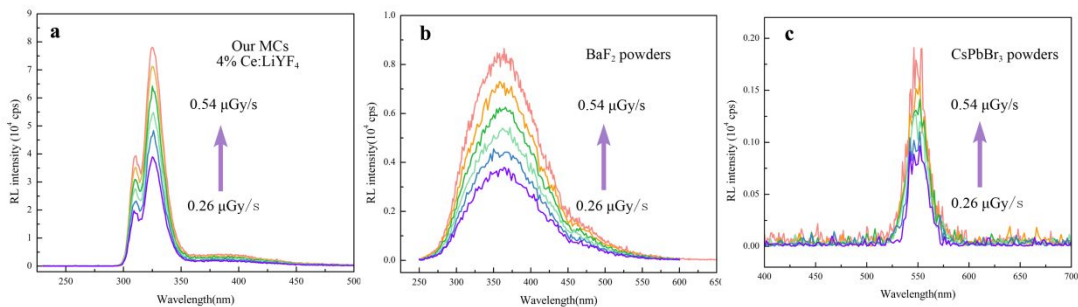

**Figure S1** (a-c) RL spectra of our MCs (4%Ce:LiYF<sub>4</sub>), BaF<sub>2</sub> and CsPbBr<sub>3</sub> powders in response to serial X-ray dose rate from 0.26  $\mu\text{Gy/s}$  to 0.54  $\mu\text{Gy/s}$ . The weight of all samples used for testing is 100 mg. BaF<sub>2</sub> (99.99%) and CsPbBr<sub>3</sub> (98%) powders were purchased from Shanghai Aladdin Bio-Chem Technology Co., LTD and Tokyo Chemical Industry Co., LTD, respectively.

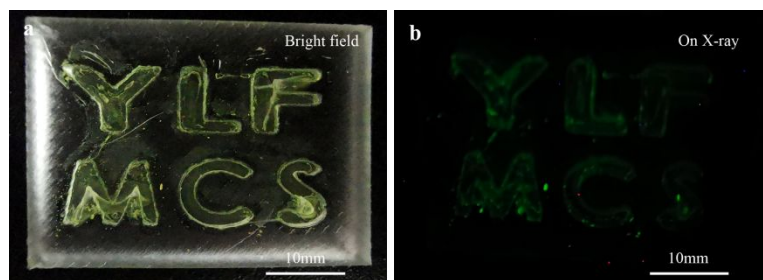

**Figure S2** (a-b) Photographs of only QDs (~50mg/ml) on PDMS substrates under bright field and X-ray illumination. The QDs exhibit a very weak RL under 0.54  $\mu\text{Gy/s}$  X-ray excitation.

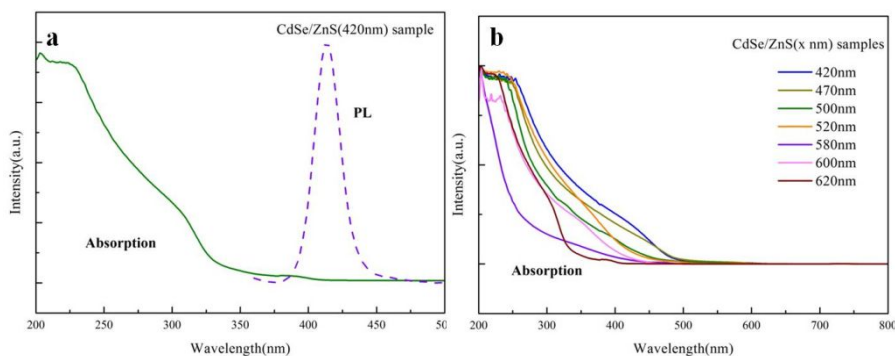

**Figure S3** (a) Absorption and PL spectra of typical CdSe/ZnS core/shell sample. (b) Serial absorption spectra of CdSe/ZnS core/shell samples.

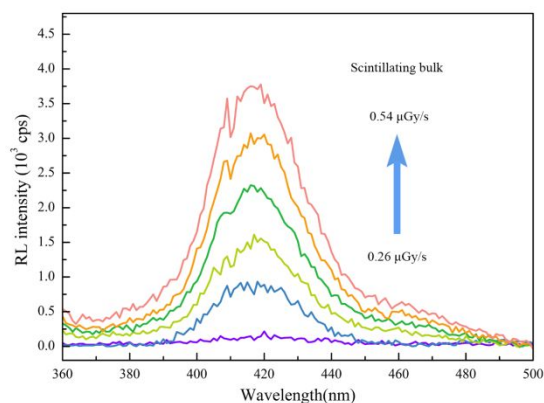

**Figure S4** RL spectra of the scintillating bulk (Sample 1) under various X-ray dose rate from 0.26  $\mu\text{Gy/s}$  to 0.54  $\mu\text{Gy/s}$ .

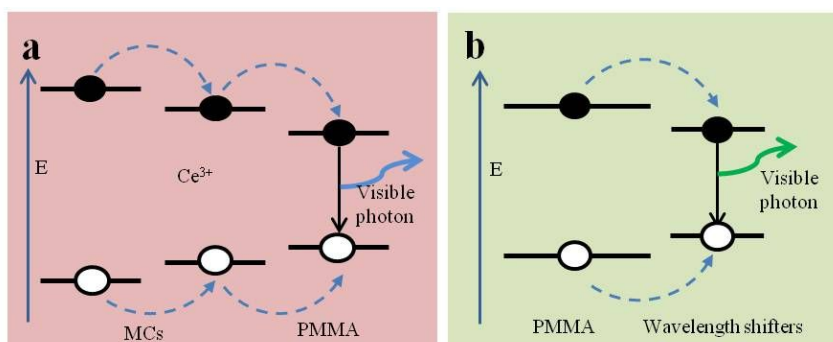

**Figure S5** (a-b) Another two possible energy-conversion routes in our scintillating bulks.

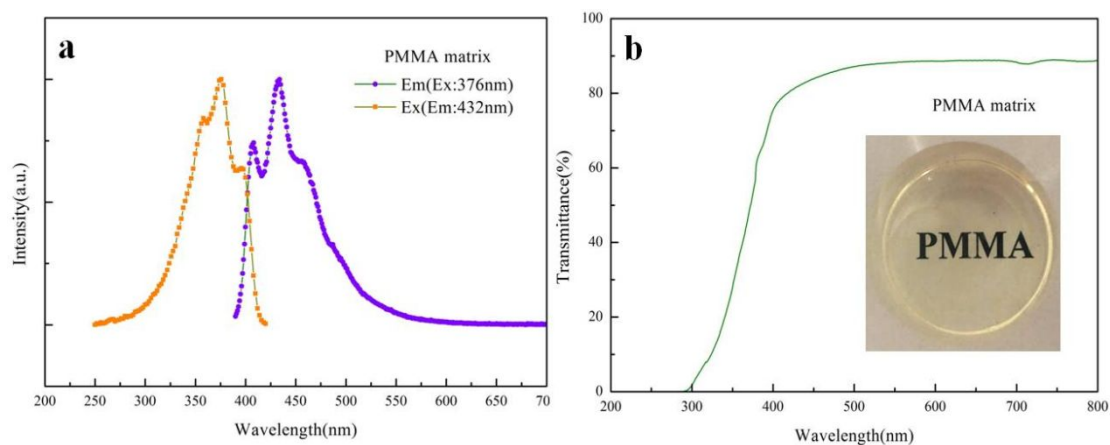

**Figure S6** (a) Excitation and emission spectra of PMMA matrix. (b) Transmittance spectrum of PMMA matrices. The inset shows the bright field photograph of PMMA matrix. The letters are under the sample.

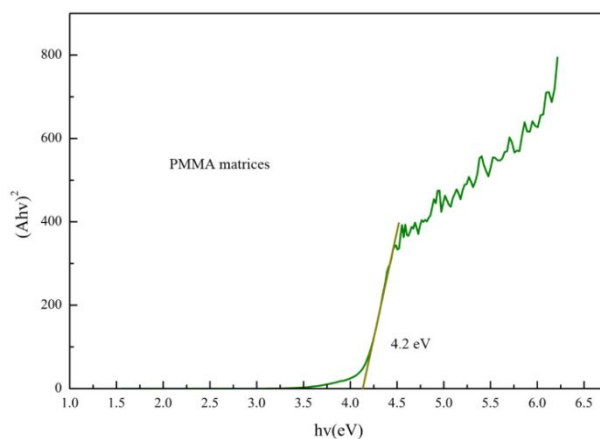

**Figure S7** Energy band of PMMA matrices calculated by diffused reflectance spectrum.

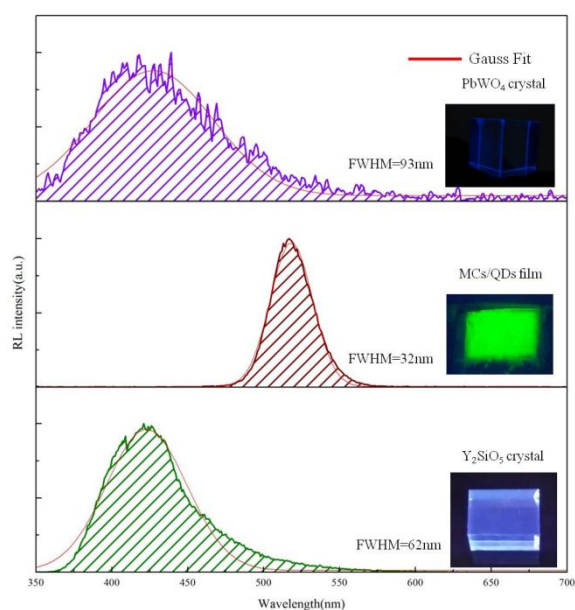

**Figure S8** RL of our scintillating film and commercial bulk inorganic crystals ( $\text{PbWO}_4$  and  $\text{Y}_2\text{SiO}_5$ ) under X-ray excitation (size information: our scintillating film (40mm×20mm),  $\text{PbWO}_4$  crystal (20mm×20mm×20mm) and  $\text{Y}_2\text{SiO}_5$  crystal (18mm×18mm×25mm)). The insets show the photographs of corresponding samples under X-ray excitation (0.54  $\mu\text{Gy/s}$ ). The FWHM results are obtained from red lines fitted with a Gaussian function, exhibiting the spectra width of RL intensity.

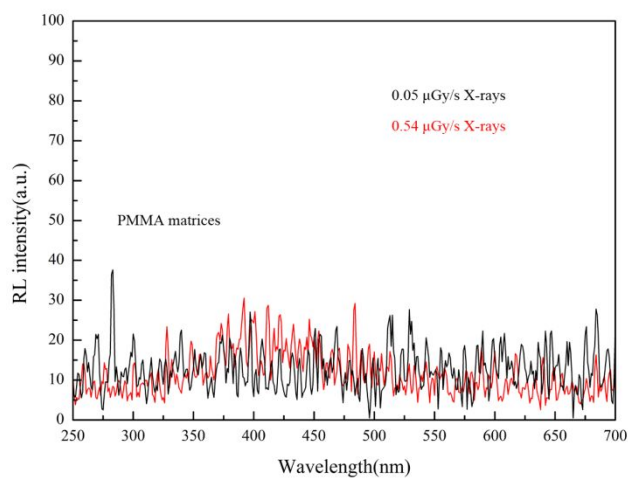

**Figure S9** RL spectra of PMMA matrices under X-ray excitation at 0.05  $\mu\text{Gy/s}$  and 0.54  $\mu\text{Gy/s}$ .

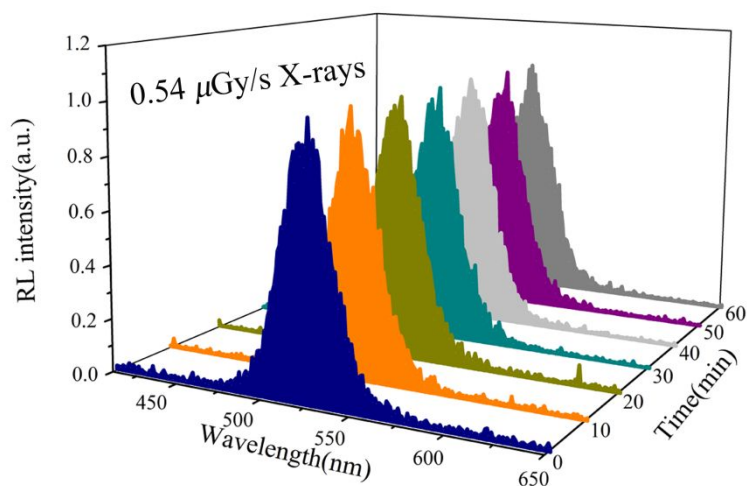

**Figure S10** RL intensity of the film under continuous 0.54  $\mu\text{Gy/s}$  X-ray irradiation for 60 minutes shows a favorable radiation hardness.

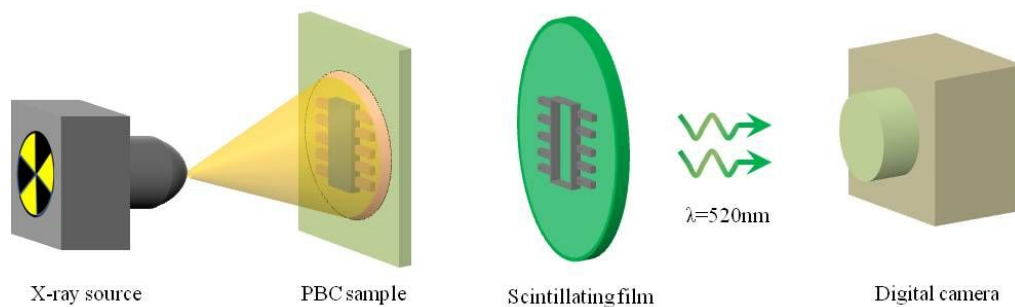

**Figure S11** A home-made X-ray imaging system for X-ray radiography.
